# Supplementary material for: Regulation of the Expression of the Myosin Heavy Chain (MYH) Gene myh14 in Zebrafish Development
Source: Springer Nature journal article supplement (doi:10.1007/s10126-021-10066-z), 2021-09-06
Supplement: 10126_2021_10066_MOESM1_ESM.pdf [file 10126_2021_10066_MOESM1_ESM.pdf]

**Expression Regulation of Myosin Heavy Chain (MYH) Gene, *myh14* in Zebrafish Development**

**Sharmin Hasan<sup>1,3\*</sup>, Shuichi Asakawa<sup>1</sup>, Shugo Watabe<sup>2</sup> and Shigeharu Kinoshita<sup>1</sup>**

<sup>1</sup>Department of Biology and Chemistry, Texas A&M International University, 5201 University Blvd,  
Laredo, TX 78041, USA.

<sup>2</sup>Department of Aquatic Bioscience, Graduate School of Agricultural and Life Sciences, The University of  
Tokyo, Bunkyo, Tokyo 113-8657, Japan.

<sup>3</sup>School of Marine Bioscience, Kitasato University, Minami-ku, Sagamihara, Kanagawa 252-0373,  
Japan.

\*Corresponding author: **Sharmin Hasan**

Department of Biology and Chemistry, Texas A&M International University, 5201 University Blvd,  
Laredo, TX 78041, USA.

Phone: (+1) 956-326-3320 (Office); E-mail: sharmin.hasan@tamiu.edu

**Supplementary Table 1. Nucleotide sequence of oligonucleotide primers of *MYH14s***

| Experiment                                | Primer name            | Nucleotide sequence (5'-3')   |
|-------------------------------------------|------------------------|-------------------------------|
| Generation of MYH14-1 constructs          | MYH14-1:2941F          | ATGCAAACCTCCACACAGAA          |
|                                           | MYH14-1:5710F          | CCAGCAGACCCAACTACACA          |
|                                           | MYH14-1:6205F          | CGGACAATTTAGCTAACCCA          |
|                                           | MYH14-1:7528F          | GGACCTCCATGACCTCAACCA         |
|                                           | MYH14-1:R              | GATGATAAATCCACCGCTGC          |
| Generation of MYH14-1 deletion constructs | MYH14-1:415Rdel        | TTCATCTTTACCCAAACCCAAG        |
|                                           | MYH14-1:549Fdel        | TATGATTTCGAAACTGCTTGCC        |
|                                           | MYH14-1:6765Rdel       | TTTACACACACACCCACACATA        |
|                                           | MYH14-1:6658Fdel       | TGTTTCAATCGGGATGATCTGA        |
|                                           | MYH14-1:7381Rdel       | CAATCCCTGCTTGATTCC            |
|                                           | MYH14-1:7329Fdel       | GTGGCGCTGAGATAAACC            |
|                                           | MYH14-1:del1&2F        | ATTTTGAAAATAATCAGTTTTGAG      |
| MYH14-1:del1&2R                           | GTATGTGTGTGAATGAATGTGT |                               |
| Generation of MYH14-2 constructs          | MYH14-2:4.9 KbF        | GAGACTCCACCTCCATTATCGCA       |
|                                           | MYH14-2:4.8 KbF        | GCTCACCTCTGAAGTTATGAACC       |
|                                           | MYH14-2:R              | CGCTTGAGTGCAGGTCC             |
| Generation of MYH14-3 constructs          | MYH14-3:5641F          | TGCTGCCCTTAGGAACTTTG          |
|                                           | MYH14-3:5641R          | GATTAACCTCTCCGGTCCCG          |
|                                           | MYH14-3:5467KbF        | CTCACCTCTGAAGTTATGAACC        |
|                                           | MYH14-3:4587KbF        | AGACTCCACCTCCATTATCGCA        |
|                                           | MYH14-3: R             | GCTTGAGTGCAGGTCC              |
| Generation of MYH14-3 deletion constructs | MYH14-3:CS1 DelF       | TTCCGTCAAACCTGTTTGCC          |
|                                           | MYH14-3:CS1 DelR       | GTTATCTGAGTACAACGGTAAAACG     |
|                                           | MYH14-3:CS2 DelF       | CTTAAAGGCTTAACTAGGTTAATTAGTTT |
|                                           | MYH14-3:CS2 DelR       | GAATGTATCTTTAAGAATATCTTTATTTG |
|                                           | MYH14-3:CS1&2 DelF     | CTTAGTGCCTTTATTAATCTGGG       |
|                                           | MYH14-3: CS1&2DelR     | GTAAAAATACCATCATTAGTAAATACT   |

**Supplementary Table 2. Nucleotide sequences of the oligo-nucleotide primers**

| Experiment                                  | Primer name           | Nucleotide sequence (5'-3')                               |
|---------------------------------------------|-----------------------|-----------------------------------------------------------|
| For cDNA synthesis                          | Gene Racer-oligo (dT) | GCTGTCAACGATACGCTACGTAACGGCA<br>TGACAGTG(T) <sub>24</sub> |
| For RT-PCR and <i>in situ</i> hybridization | MYH14-2F              | GCAGAAGAAGAGTGCAGAGTTCC                                   |
|                                             | MYH14-2R              | GCTGTCAACGATACGCTACGTAACG                                 |
|                                             | MYH14-3F              | AGAGGAGAGGGCAGACATG                                       |
|                                             | MYH14-3R              | CAAACAACCTGTCCATAAA                                       |
|                                             | $\beta$ -actin-F      | TGCTGTTTTCCCCTCCATTG                                      |
|                                             | $\beta$ -actin-R      | TCTGTCCCATGCCAACCAT                                       |

**Supplementary Table 3. Primers used for real time PCR analysis**

| Experiment             | Primer name | Nucleotide sequence (5' - 3') |
|------------------------|-------------|-------------------------------|
| Real time-PCR analysis | EGFP-F      | AGCAAAGACCCCAACGAGAA          |
|                        | EGFP-R      | GCGGCGGTCACGAACTC             |
|                        | GAPDH-F     | TGTTTCCTCGTCCCGTAG            |
|                        | GAPDH-R     | CAATCTCCACTTTGCCACT           |
